# Supplementary material
Source: Springer Nature journal article supplement (https://www.springermedizin.de/resource/supplementary/12935_2009_234_MOESM2_ESM.pdf/9540172)

**(a)**

| RETINOIDS            | -1797 p27 (p27-Kpn1)<br>LUCIFERASE ACTIVITY |         | MNU-INDUCED RAT<br>MAMMARY CANCER |
|----------------------|---------------------------------------------|---------|-----------------------------------|
|                      | MEAN (%)                                    | SEM (%) | INHIBITION (%)                    |
| Vehicle              | 100.0                                       | 3.6     | None                              |
| 4meUAB30             | 187.8                                       | 7.3     | 75 – 85% (highly active)          |
| 9- <i>cis</i> -RA    | 164.5                                       | 11.0    | 45% (intermediate activity)       |
| RA-IV-68A            | 163.6                                       | 10.7    | n.d.                              |
| 13- <i>cis</i> -RA   | 145.1                                       | 6.1     | n.d.                              |
| UAB30                | 131.8                                       | 5.3     | 60% (intermediate activity)       |
| <i>all-trans</i> -RA | 126.5                                       | 8.8     | n.d.                              |
| UAB112               | 121.4                                       | 2.8     | 1% (almost no activity)           |
| UAB76                | 109.6                                       | 7.0     | n.d.                              |
| UAB20                | 108.3                                       | 1.7     | 25 - 30% (limited activity)       |

**(b)**Class I UAB Reginoids

| REXINOID       | n | R <sub>4</sub> |
|----------------|---|----------------|
| UAB30          | 1 | hydrogen       |
| 4-methyl-UAB30 | 1 | methyl         |

Class II UAB Reginoids

| REXINOID  | R <sub>1</sub> | R <sub>2</sub> |
|-----------|----------------|----------------|
| UAB20     | phenyl         | iso-propyl     |
| UAB76     | ethyl          | iso-butyl      |
| UAB112    | phenyl         | iso-butyl      |
| RA-IV-68A | iso-propyl     | iso-butyl      |

**(c)**

-1797 p27 (p27-Kpn1) Luciferase Activity  
(Average % Stimulation by Retinoids)

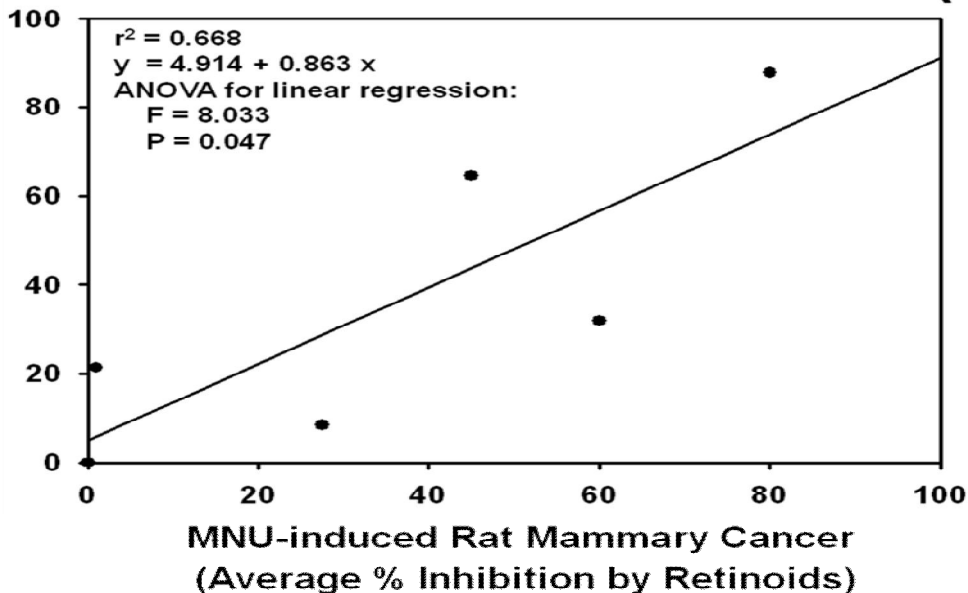

Supplement: MOESM2 [file 9540172]
